# Supplementary material for: Vaccine-Derived Polioviruses Not Detected by Global Surveillance Screening Assay
Source: PubMed Central journal article supplement (PMC4593449; doi:10.3201/eid2110.150702), 2015-10
Supplement: 15-0702-Techapp-s1.pdf [file 15-0702-Techapp-s1.pdf]

# Vaccine-Derived Polioviruses Not Detected by Global Surveillance Screening Assay

## Technical Appendix

**Technical Appendix Table.** Nucleotide substitutions in 5' UTR and capsid region of type 2 and type 3 VDPV strains\*

| Region | Type 2 VDPV    |            |            | Type 3 VDPV          |                          |
|--------|----------------|------------|------------|----------------------|--------------------------|
|        | Nucleotide no. | R93150     | R93152     | Nucleotide no.       | R46064                   |
| 5'UTR  | 481            | A→G        | A→G        | 472                  | T→C                      |
|        | 681            |            | T→C        |                      |                          |
|        | 707            | A→T        |            |                      |                          |
|        | 730            |            | T→C        |                      |                          |
| VP4    | 831            | T→C        |            | 844                  | A→G                      |
|        | 927            |            | C→A        |                      |                          |
| VP2    | 1059           | C→T        | C→T        | 1066<br>1567         | T→C<br>T→C               |
|        | 1164           | T→G        |            |                      |                          |
|        | 1168           |            | C→T        |                      |                          |
|        | 1469           | <b>A→G</b> |            |                      |                          |
|        | 1507           | C→T        |            |                      |                          |
|        | 1704           | G→A        |            |                      |                          |
| VP3    | 1857           |            | C→T        | 2034<br>2278<br>2401 | <b>T→C</b><br>T→C<br>T→C |
|        | 1943           |            | <b>G→T</b> |                      |                          |
|        | 2025           |            | G→A        |                      |                          |
|        | 2046           | C→T        |            |                      |                          |
|        | 2055           | A→G        | A→G        |                      |                          |
|        | 2420           | <b>A→G</b> | <b>A→G</b> |                      |                          |
|        | 2475           |            | <b>G→A</b> |                      |                          |
|        | VP1            | 2490       | T→C        |                      |                          |
| 2525   |                | <b>A→G</b> |            |                      |                          |
| 2739   |                | C→T        |            |                      |                          |
| 2766   |                |            | T→C        |                      |                          |
| 2829   |                | T→C        |            |                      |                          |
| 2908   |                |            | <b>A→G</b> |                      |                          |
| 2958   |                | T→C        |            |                      |                          |
| 2992   |                | <b>A→G</b> | <b>A→G</b> |                      |                          |
| 3057   |                |            | A→G        |                      |                          |
| 3381   |                |            | T→G        |                      |                          |

\*Nucleotide substitutions are shown as Sabin→Isolate; Nucleotide substitutions causing amino acid changes are shown in bold type; The complete genome sequences of R93150, R93152, and R46064 were submitted to GenBank (accession nos. KR259356–KR259358). UTR, untranslated region; VDPV, vaccine-derived poliovirus.

|         | VP2          |                     |      | VP3                  |        | VP1                    |       |       |
|---------|--------------|---------------------|------|----------------------|--------|------------------------|-------|-------|
|         | NAg3b        | NAg2                | NAg2 | NAg3a                | NAg3b  | NAg1                   | NAg2  | NAg3a |
|         | 71           | 164                 | 268  | 54                   | 75     | 88                     | 222   | 287   |
| Sabin 2 | WRK          | TNATNPARNPRT        | PRTQ | PLNLTSQRVELSD        | TAHSDT | AIIEVDNDAPTKRASRLFS    | STEGD | KDGLT |
| R93150  | ...          | ..... <b>S</b> .... | .... | .....                | .....  | .....                  | ..... | ..... |
| R93152  | . <b>C</b> . | .....               | .... | ..... <b>I</b> ..... | .....  | .....                  | ..... | ..... |
| Sabin 3 | WGK          | NAVTSFKREPKE        | PKFQ | PLNLESTKVTLSD        | SADLSQ | IEVDNEQPTTRAQKLFAMW    | QIGDS | NNLDP |
| R46064  | ...          | .....               | .... | .....                | .....  | ..... <b>Q.I</b> ..... | ..... | ..... |

Technical Appendix Figure 1. Amino acid changes at neutralizing antigenic sites (NAg) of VDPVs. The number indicates the first amino acid position within the antigenic site.

```

Sabin2      AAACTGGAATTTTTACATATTCGAGATTTGACATGGAGTTCACTTTTTGTGGTCACCTCA
R-93150    AAACTGGAATTTTTACATATTCGAGATTTGACATGGAGTTCACTTTTTGTGGTCACCTCA
R-93152    AAACTGGAATTTTTACATATTCGAGATTTGACATGGAGTTCACTTTTTGTGGTCACCTCA
*****

Sabin2      AACTACATTGATGCAAATAACGGACATGCATTGAACCAAGTTTATCAGATAATGTATATA
R-93150    AACTACATTGATGCAAATAACGGACATGCATTGAACCAAGTTTATCAGATAATGTACATA
R-93152    AACTACGTTGATGCAAATAACGGACATGCATTGAACCAAGTTTATCAGATAATGTATATA
*****

Sabin2      CCACCCGGAGCACCTATCCCTGGTAAATGGAAATGACTATACGTGGCAGACGTCTCTAAC
R-93150    CCACCCGGAGCACCTATCCCTGGTAAATGGGATGACTATACGTGGCAGACGTCTCTAAC
R-93152    CCACCCGGAGCACCTATCCCTGGTAAATGGGATGACTATACGTGGCAGACGTCTCTAAC
*****

Sabin3      GTTCGTGTTGTCAATGATCACAACCCCACTAAAGTAACCTCCAAAGTCCGCATTTTACATG
R-46064    GTTCGTGTTGTCAATGATCACAACCCCACTAAAGTAACCTCCAAAGTCCGCATTTTACATG
*****

Sabin3      AAACCCAAACACGTACGTGTCTGGTGCCCTAGACCGCCGCGCGCGGTACCTTATTATGGA
R-46064    AAACCCAAACACGTACGTGTCTGGTGCCCTAGACCGCCGCGCGCGGTACCTTATTATGGA
*****

Sabin3      CCAGGGGTGGACTATTAGGAACAACTTGGACCCCTTATCTGAGAAAGGTTTGACCACATAT
R-46064    CCAGGGGTGGACTATTAGGAACAACTTGGACCCCTTATCTGAGAAAGGTTTGACCACATAT
*****

```

Technical Appendix Figure 2. Nucleotide sequence alignment of VDPV2 and VDPV3 with corresponding Sabin vaccine virus sequences. Primer and probe regions are shown in bold type.
